# Supplementary material
Source: MDPI journal article supplement (https://www.mdpi.com/2071-1050/12/18/7757)
Supplement: s1 [file s1]

Archive with 3 entries (3 files):
- Supplementary material S1. Silages experiment 1..pdf
- Supplementary material S2. Preference test experiment 2..pdf
- Supplementary material S3. Silages experiment 3..pdf
