# Supplementary material
Source: MDPI journal article supplement (https://www.mdpi.com/2071-1050/12/18/7757)
Supplement: s1 [file s1 › Supplementary material S1. Silages experiment 1..pdf]

**Supplementary material S1. Elaboration of silages with *Cucurbita argyrosperma* Huber residue in experiment 1.**

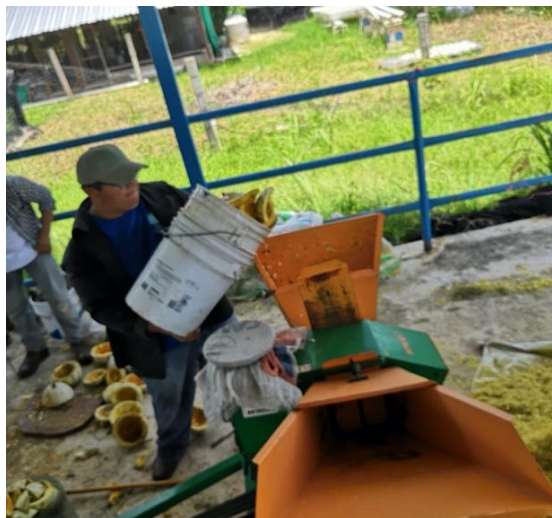

**a. Chop the residue of *Cucurbita argyrosperma* Huber with a gasoline grinder.**

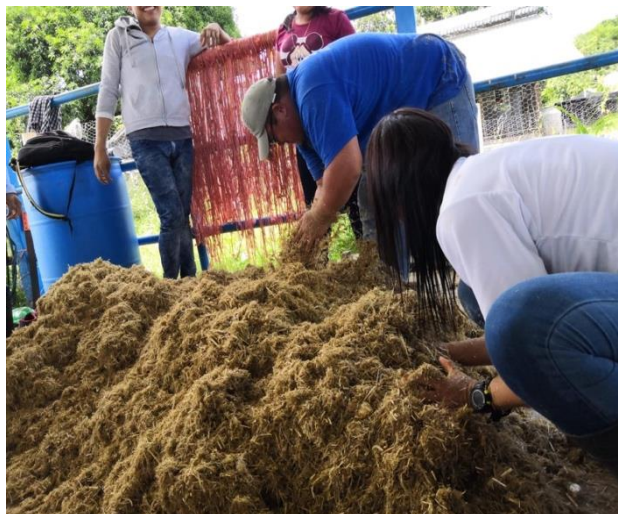

**b. Manual mixing of the *Cucurbita argyrosperma* Huber residue with straw and the additive until obtaining a homogeneous mixture.**

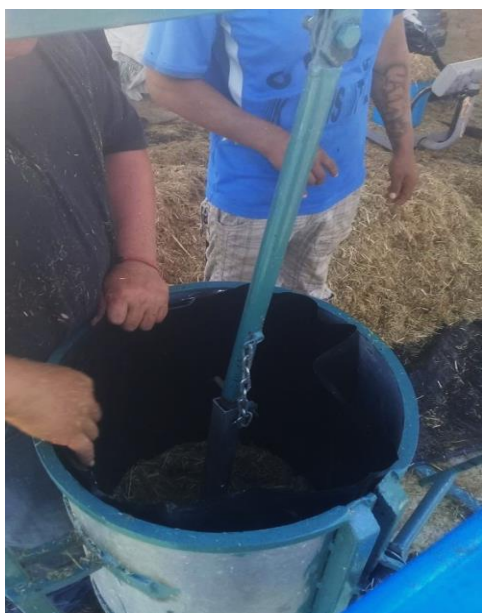

**c. Fill the bags with the *Cucurbita argyrosperma* Huber mixture with straw and additive. Layers of around 15 cm were placed for better compaction.**

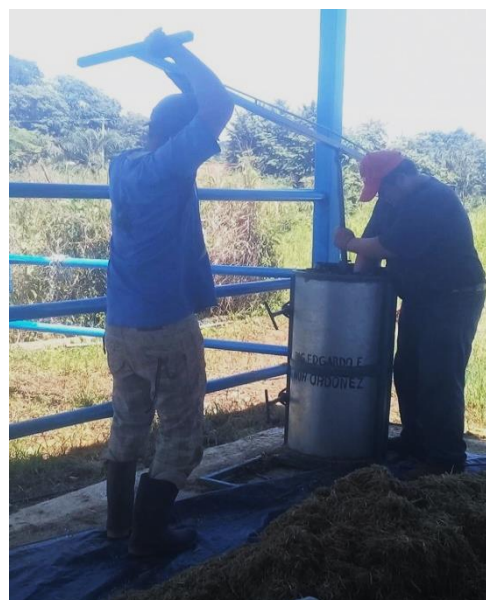

**d. Compaction of the mixture of *Cucurbita argyrosperma* Huber with straw.**

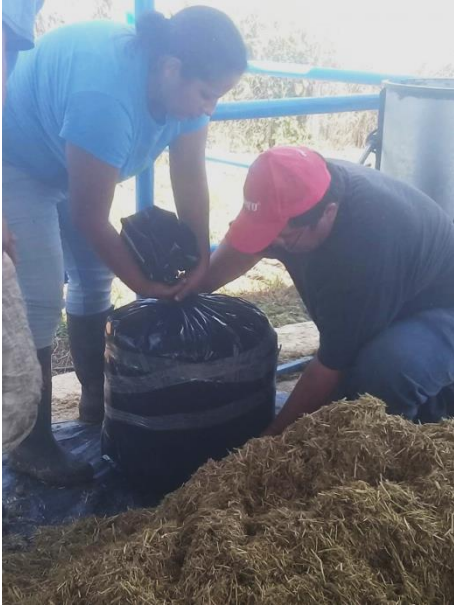

**e. Sealing the bags removing the greatest amount of air.**

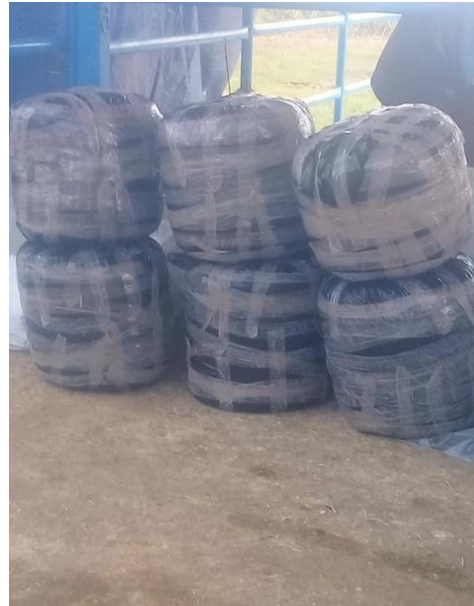

**f. Silos closed and ready to be stored.**
