# Supplementary material
Source: MDPI journal article supplement (https://www.mdpi.com/2071-1050/12/18/7757)
Supplement: s1 [file s1 › Supplementary material S2. Preference test experiment 2..pdf]

**Supplementary material S2. Design of the feeders in the preference test of Experiment 2.**

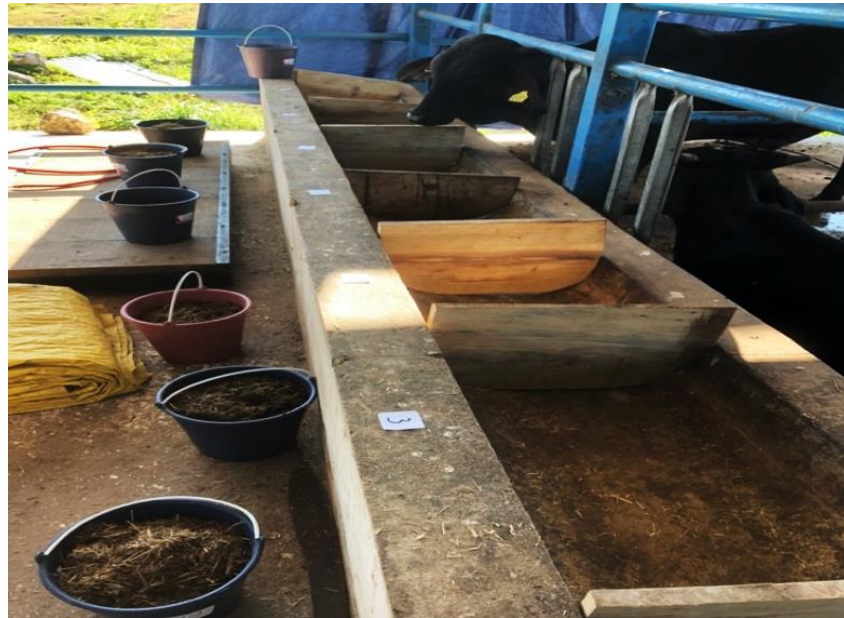

**a. Design of the feeders and preparation of the material to offer to the steers. A linear concrete feeder divided with wooden boards is observed so that each steer had access to four compartments. Labels were placed on the front of each compartment to identify and place the corresponding silage.**
