# Supplementary material
Source: MDPI journal article supplement (https://www.mdpi.com/2071-1050/12/18/7757)
Supplement: s1 [file s1 › Supplementary material S3. Silages experiment 3..pdf]

**Supplementary material S3. Elaboration of the *Cucurbita argyrosperma* Huber silage in experiment 3.**

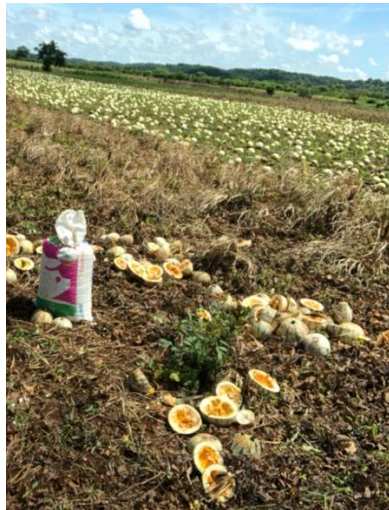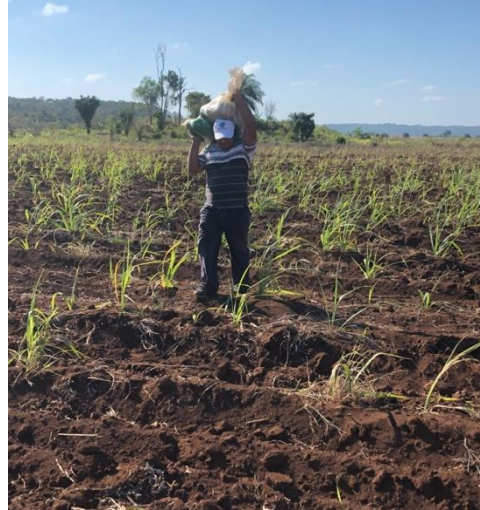

**a. Manual collection of the *Cucurbita argyrosperma* Huber residue. In Campeche, Mexico, the harvest of seeds of this pumpkin is done manually in the same field of cultivation, leaving the rest of the fruit (peel and pulp) right there, which was used to make the silage.**

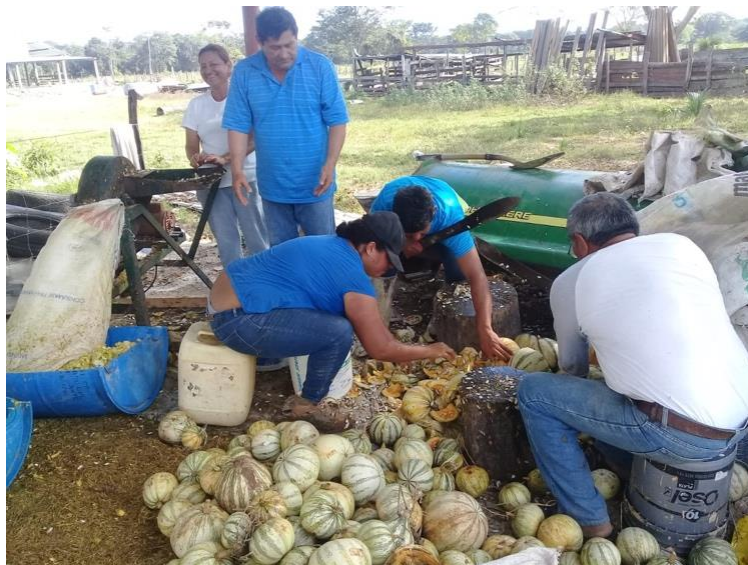

**b. Chopping of the *Cucurbita argyrosperma* Huber residue in the "Cabahuil" ranch. It is a common practice that when pumpkins do not reach the appropriate size to obtain seeds, they are left in the cultivation field without any use, which we use to make the silage from experiment 3.**

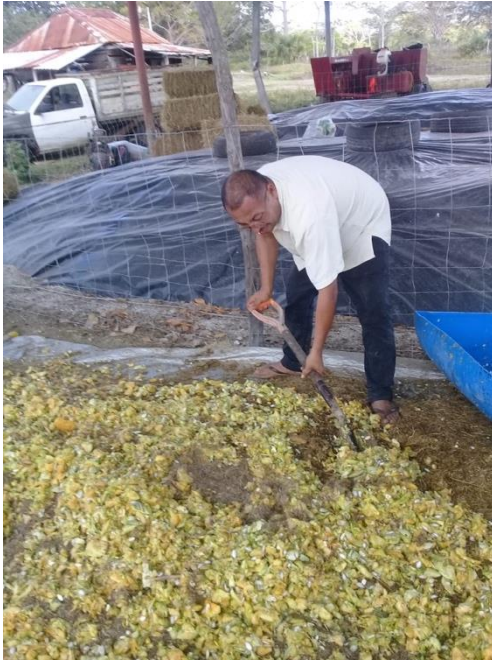

c. Mixing the residue of *Cucurbita argyrosperma* Huber with straw until obtaining a homogeneous mixture.

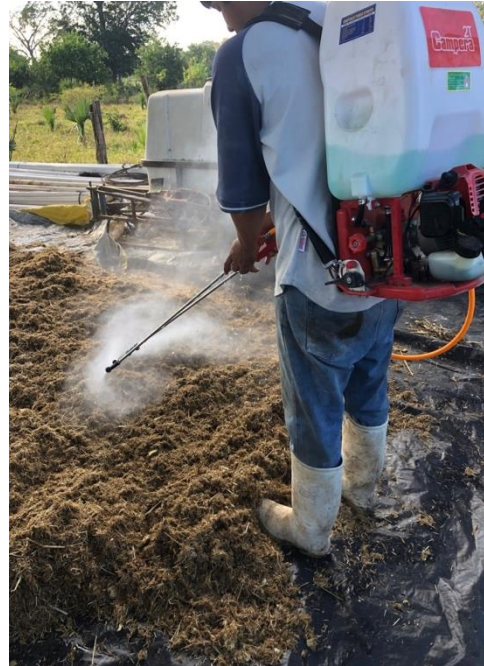

d. Biosile® inoculant application with a manual sprayer. Layers of the mixed material were placed in the silo by spraying the inoculant.

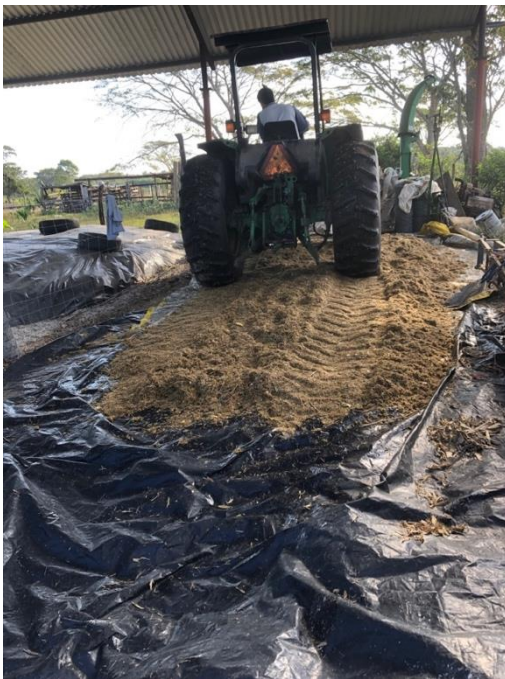

e. Compaction was carried out with a tractor to eliminate spaces in the mixture and decrease the amount of air.

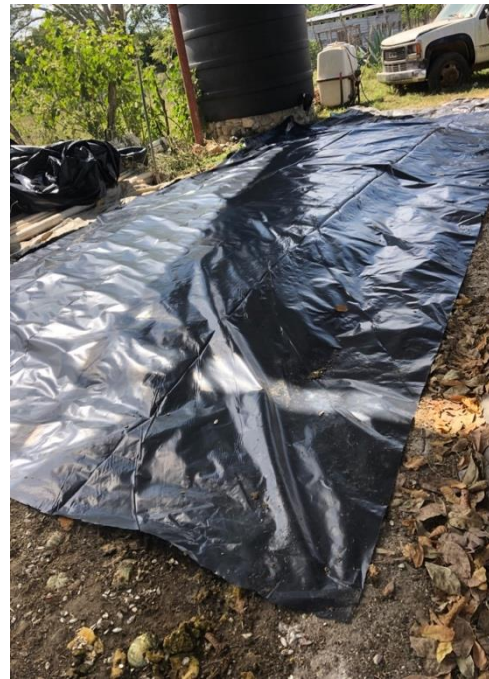

f. Once the mix was compacted, it was covered with a 600 gauge plastic tarp.

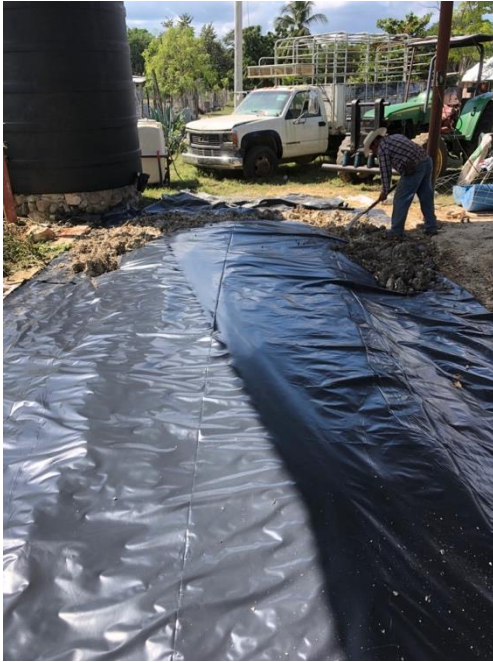

**g.** To prevent air or water from entering, soil was placed around the plastic covering the silage.

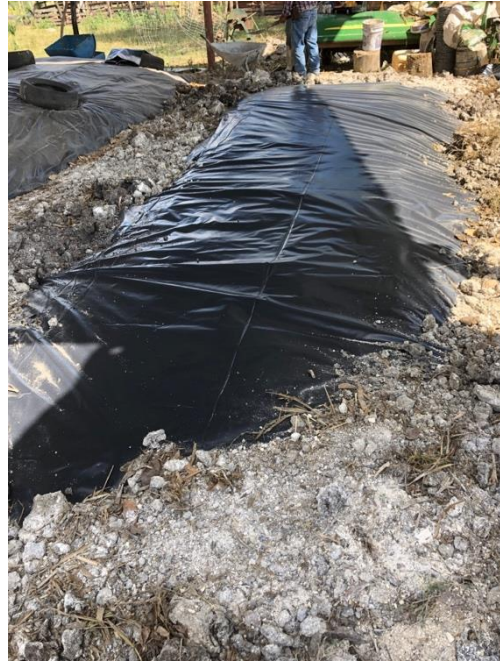

**h.** Final image of the silo.
